# Supplementary material for: Cytochalasin B Modulates Nanomechanical Patterning and Fate in Human Adipose-Derived Stem Cells
Source: MDPI journal article supplement (doi:10.3390/cells11101629), 2022-05-12
Supplement: s1 [file s1]

**Table S1.** Cell viability of human adipose-derived stem cells (hASCs) after 3, 6 or 14 days of Cytochalasin B (CB) treatment.

| Group     | <i>t</i> of analysis | <i>t</i> of analysis | <i>t</i> of analysis |
|-----------|----------------------|----------------------|----------------------|
|           | 3 days               | 6 days               | 14 days              |
| CTR       | 96.4 ± 1.1           | 94.2 ± 2.2           | 93.6 ± 1.4           |
| DMSO      | 94.2 ± 3.2           | 93.8 ± 2.7           | 91.4 ± 3.5           |
| CB 0.1 µM | 94.7 ± 3.8           | 93.7 ± 2.3           | 92.3 ± 2.2           |
| CB 1 µM   | 94.0 ± 3.4           | 93.3 ± 2.7           | 92.2 ± 3.3           |
| CB 5 µM   | 92.8 ± 1.2           | 88.3 ± 3.3           | 87.2 ± 3.8           |
| CB 10 µM  | 91.8 ± 2.8           | 88.0 ± 2.6           | 87.9 ± 2.0           |

*t*: time; 3, 6 or 14 days: after 3, 6 or 14 days of treatment; CB: Cytochalasin B treated cells; DMSO: dimethyl sulfoxide treated cells; CTR: control (untreated cells). Cell viability: percentage of living cells/total number of cells ± standard deviation (SD).
